# Supplementary material for: Comprehensive analysis of ferritin subunits expression and positive correlations with tumor-associated macrophages and T regulatory cells infiltration in most solid tumors
Source: publisher site journal article supplement (doi:10.18632/aging.202841), 2021-04-16
Supplement: Supplementary file [file aging-v13i8-202841-supplementary-material-SD1.pdf]

## SUPPLEMENTARY FIGURE

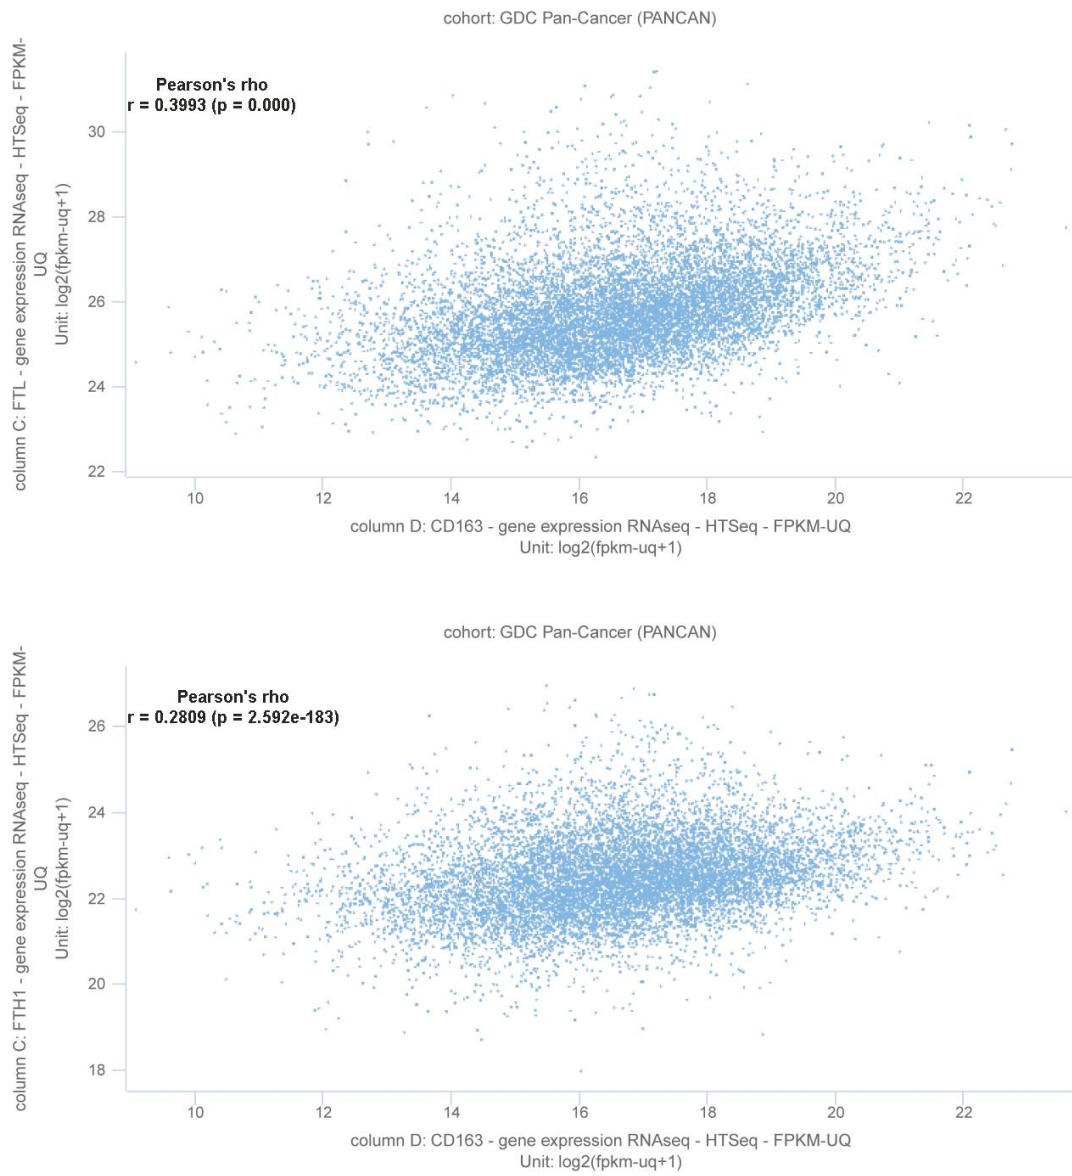

**Supplementary Figure 1. The positive correlations between FTH1 and FTL levels and CD163.**
