# Supplementary material for: Comprehensive analysis of ferritin subunits expression and positive correlations with tumor-associated macrophages and T regulatory cells infiltration in most solid tumors
Source: publisher site journal article supplement (doi:10.18632/aging.202841), 2021-04-16
Supplement: Supplementary file [file aging-v13i8-202841-supplementary-material-SD2.pdf]

## SUPPLEMENTARY TABLES

**Supplementary Table 1. Baseline demographic and clinical characteristics of the patients in this study.**

|                                 | n (%)                    |
|---------------------------------|--------------------------|
| <b>Tumor</b>                    | 10147(100)               |
| Gender                          |                          |
| Male/ Female                    | 4810 (47.4)/ 5337 (52.6) |
| Age (years at diagnosis)        |                          |
| Mean                            | 59.1                     |
| Range                           | 10~90                    |
| <b>Samples for COX analysis</b> | 3068(100)                |
| Gender                          |                          |
| Male/ Female                    | 1814 (59.1)/ 1254 (40.9) |
| Age (years at diagnosis)        |                          |
| Mean                            | 57.1                     |
| Range                           | 14~90                    |
| T-stages                        |                          |
| T0/ T1                          | 3(0.1)/ 679(22.1)        |
| T2/ T3                          | 515(16.8)/ 543(17.7)     |
| T4/ Not reported                | 298(9.7)/ 1030(33.6)     |
| N-stages                        |                          |
| N0/ N1                          | 983(32.0)/ 221(7.2)      |
| N2/ N3                          | 255(8.3)/ 16(0.5)        |
| Not reported                    | 1593(51.9)               |
| M-stages                        |                          |
| M0/ M1                          | 998(32.5)/ 46(1.5)       |
| Not reported                    | 2024(66.0)               |
| Clinical-stages                 |                          |
| I/ II                           | 637(20.8)/ 483(15.7)     |
| III/ IV                         | 519(16.9)/ 482(15.7)     |
| Not reported                    | 947(30.9)                |
| <b>Normal</b>                   | 6678(100)                |
| Gender                          |                          |
| Male/ Female                    | 4074 (61.0)/ 2604 (39.0) |
| Age (years at diagnosis)        |                          |
| Mean                            | 61.4                     |
| Range                           | 15~90                    |

n. number of patients.

**Supplementary Table 2. Correlation of FTH1 and FTL and common clinicopathological factors with patients' overall survival in the TCGA datasets.**

|                       |    | <b>LGG</b> | <b>UVM</b> | <b>LIHC</b> | <b>BLCA</b> | <b>KIRP</b> | <b>CESC</b> | <b>HNSC</b> | <b>LAML</b> | <b>KICH</b> |
|-----------------------|----|------------|------------|-------------|-------------|-------------|-------------|-------------|-------------|-------------|
| Likelihood ratio test | p  | 1E-15      | 0.002      | 0.00002     | 0.007       | 8e-07       | 0.04        | 4e-06       | 8e-05       | 8e-04       |
| Wald test             | p  | 4E-16      | 0.02       | 0.00003     | 0.008       | 0.002       | 0.01        | 5e-06       | 2e-04       | 1           |
| Score (logrank) test  | p  | 2E-16      | 0.005      | 0.000005    | 0.004       | 3e-13       | 0.009       | 2e-08       | 1e-04       | 4E-07       |
| FTH1                  | p  | 0.692549   | 0.79707    | 0.2346      | 0.6144      | 0.95248     | 0.85855     | 0.10267     | 0.101408    | 0.999       |
|                       | HR | 0.9269     | 1.166      | 1.186       | 1.0885      | 0.9733      | 1.0400      | 1.4491      | 1.4170      | 8.537e-05   |
| FTL                   | p  | 0.000132   | 0.01089    | 0.0344      | 0.5750      | 0.27542     | 0.77144     | 0.50358     | 0.486831    | 0.998       |
|                       | HR | 1.6298     | 6.087      | 1.294       | 0.9122      | 1.4923      | 0.9316      | 0.8860      | 0.8617      | 2.775e+11   |
| Age                   | p  | 1.21E-13   | 0.00105    | 0.3568      | 0.1250      | 0.02366     | 0.41176     | 0.36534     | 0.000221    | 0.996       |
|                       | HR | 1.0001     | 1          | 1.000       | 1.0001      | 0.9999      | 1.0000      | 1.0000      | 1.0001      | 1.006e+00   |
| Gender                | p  | 0.602136   | 0.47593    | 0.5297      | 0.0782      | 0.87147     | NA          | 0.06813     | 0.513440    | 0.994       |
|                       | HR | 0.9082     | 0.63       | 1.178       | 1.6040      | 0.8682      | NA          | 1.7187      | 1.1610      | 1.314e-44   |
| M-stages              | p  | NA         | NA         | 0.6672      | 0.5218      | 0.00324     | NA          | 0.00577     | NA          | 0.999       |
|                       | HR | NA         | NA         | 0.742       | 1.4169      | 56.9888     | NA          | 21.0568     | NA          | 1.138e-06   |
| N-stages              | p  | NA         | NA         | 0.5869      | 0.3838      | 0.68099     | 0.00384     | 9.88e-06    | NA          | 0.993       |
|                       | HR | NA         | NA         | 1.729       | 1.2352      | 0.7407      | 2.8817      | 2.0615      | NA          | 1.294e+38   |
| T-stages              | p  | NA         | 0.78393    | 0.3872      | 0.1743      | 0.12485     | 0.04467     | 0.00171     | NA          | 0.999       |
|                       | HR | NA         | 1.235      | 1.448       | 1.3953      | 0.2999      | 1.9518      | 1.7799      | NA          | 9.227e+10   |
| Clinical stages       | p  | NA         | 0.46687    | 0.5739      | 0.5797      | 0.11381     | 0.10909     | 0.00527     | NA          | 0.999       |
|                       | HR | NA         | 2.024      | 1.313       | 1.2045      | 3.2560      | 0.5947      | 0.5374      | NA          | 2.570e-05   |

HR: hazard ration.
